# Supplementary material for: Cell-to-Cell Transmission of HIV-1 and HIV-2 from Infected Macrophages and Dendritic Cells to CD4+ T Lymphocytes
Source: MDPI journal article supplement (doi:10.3390/v15051030), 2023-04-22
Supplement: s1 [file s1]

## Supplementary material

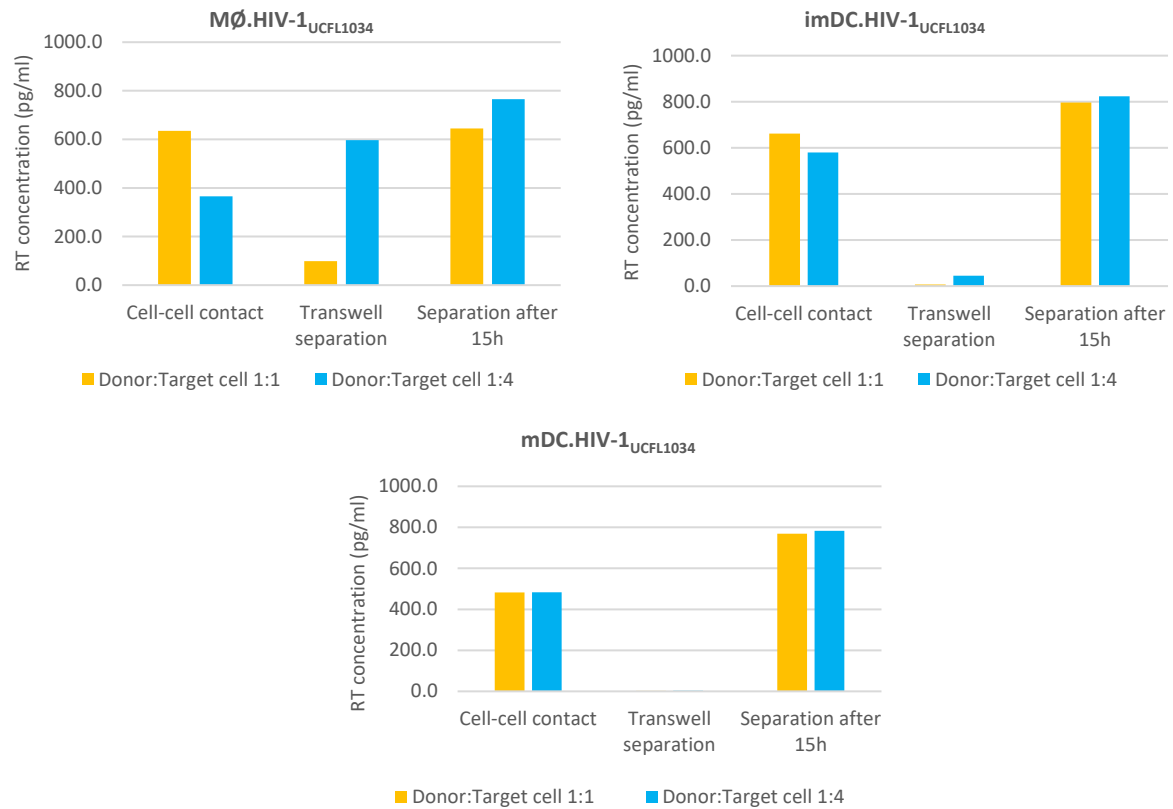

**Figure S1.** CD4<sup>+</sup> T lymphocytes trans-infection by Mø, imDCs, and mDCs infected by HIV-1<sub>UCFL1034</sub> primary isolate. These experiments were performed in three conditions: i) cell-cell contact, allowing donor and target cells to be in coculture throughout the experiment; ii) donor and target cells separated by a transwell to prevent cell-cell contact; and iii) donor and target cells separated 15 hours after coculture. Peak RT concentration was measured in culture supernatants during a 7-day period after virus inoculation.

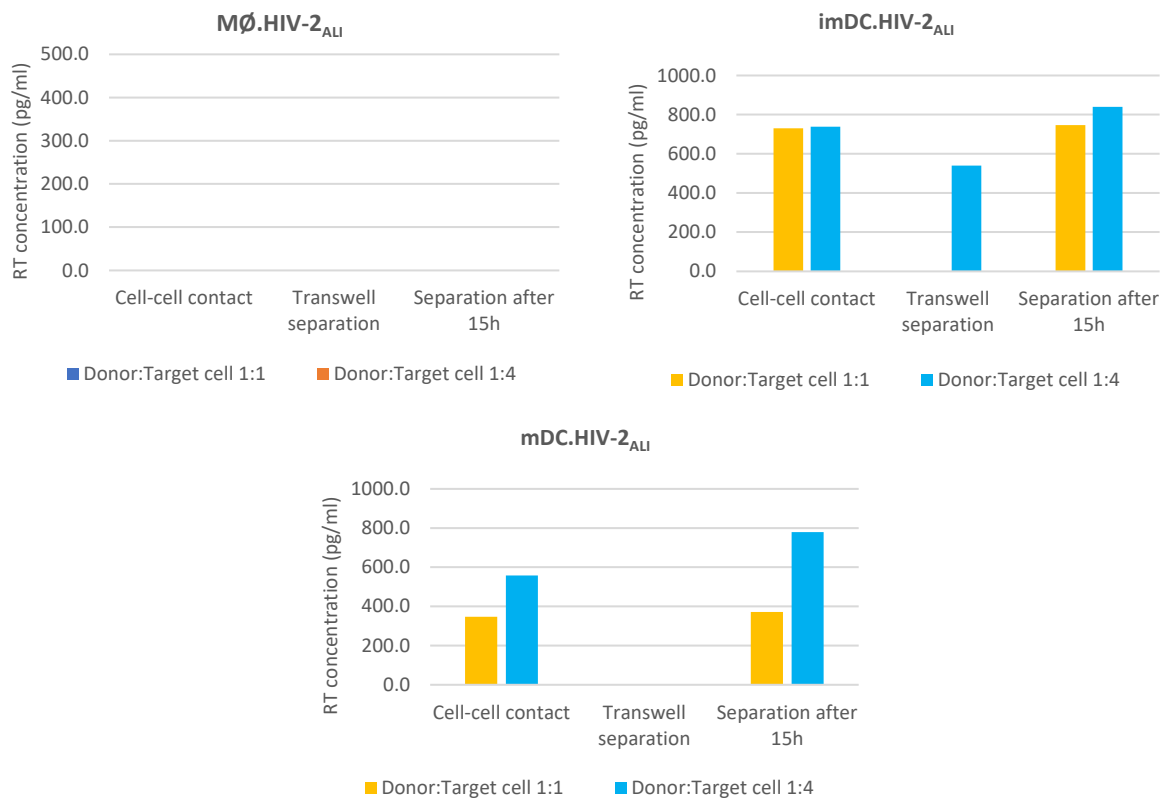

**Figure S2.** CD4<sup>+</sup> T lymphocytes trans-infection by Mø, imDCs, and mDCs infected by HIV-1<sub>ALI</sub> primary isolate. These experiments were performed in three conditions: i) cell-cell contact, allowing donor and target cells to be in coculture throughout the experiment; ii) donor and target cells separated by a transwell to prevent cell-cell contact; and iii) donor and target cells separated 15 hours after coculture. Peak RT concentration was measured in culture supernatants during a 7-day period after virus inoculation.

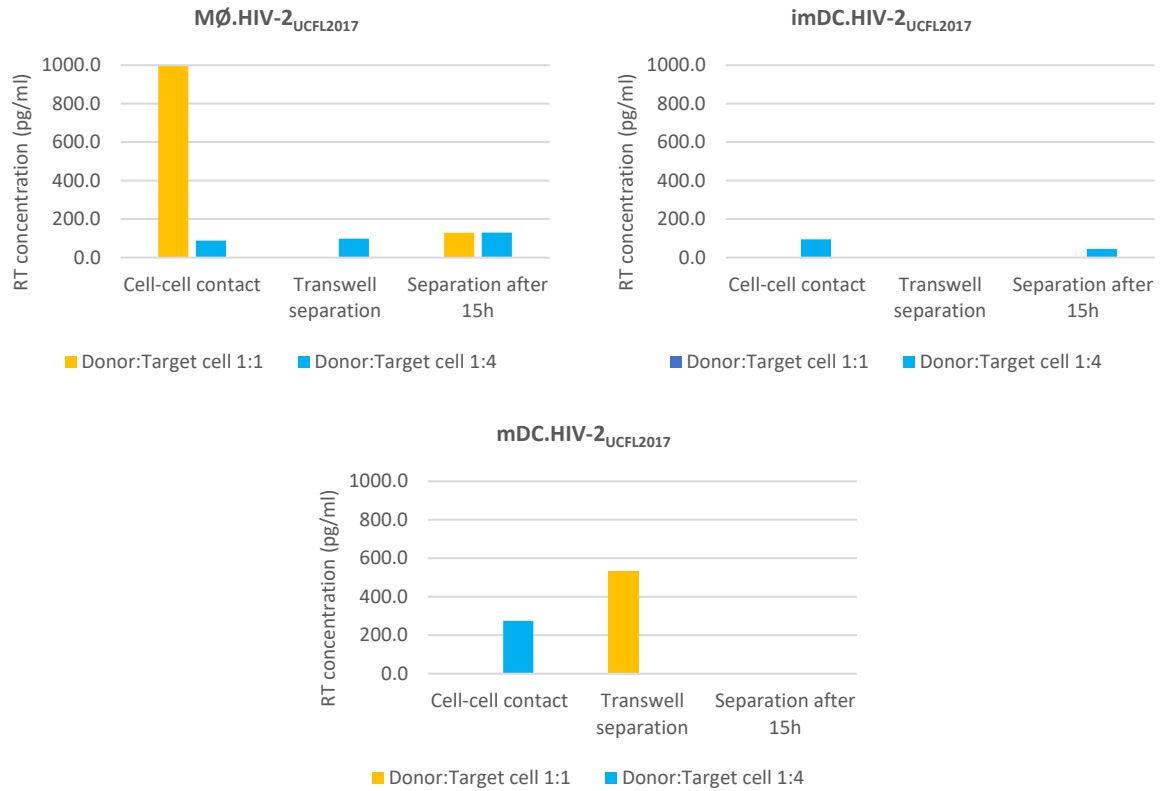

**Figure S3.** CD4<sup>+</sup> T lymphocytes trans-infection by Mø, imDCs, and mDCs infected by HIV-1<sub>UCFL2017</sub> primary isolate. These experiments were performed in three conditions: i) cell-cell contact, allowing donor and target cells to be in coculture throughout the experiment; ii) donor and target cells separated by a transwell to prevent cell-cell contact; and iii) donor and target cells separated 15 hours after coculture. Peak RT concentration was measured in culture supernatants during a 7-day period after virus inoculation.

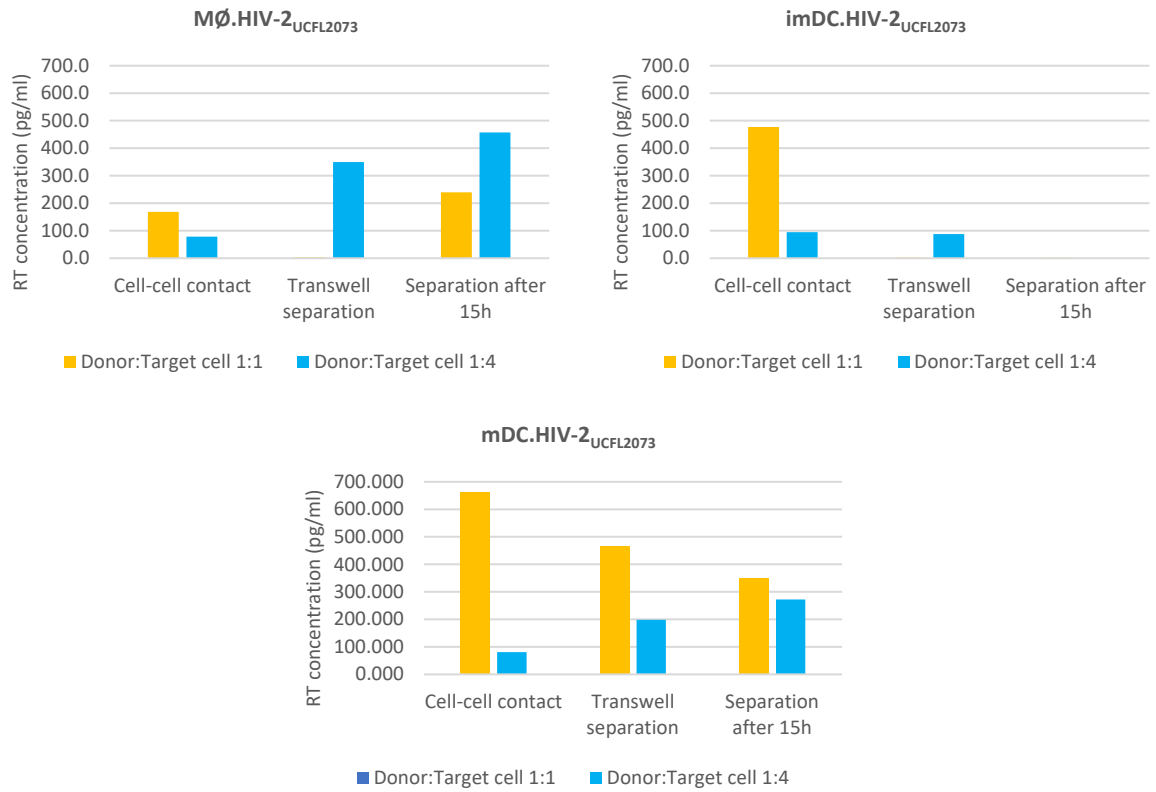

**Figure S4.** CD4<sup>+</sup> T lymphocytes trans-infection by Mø, imDCs, and mDCs infected by HIV-1<sub>UCFL2073</sub> primary isolate. These experiments were performed in three conditions: i) cell-cell contact, allowing donor and target cells to be in coculture throughout the experiment; ii) donor and target cells separated by a transwell to prevent cell-cell contact; and iii) donor and target cells separated 15 hours after coculture. Peak RT concentration was measured in culture supernatants during a 7-day period after virus inoculation.

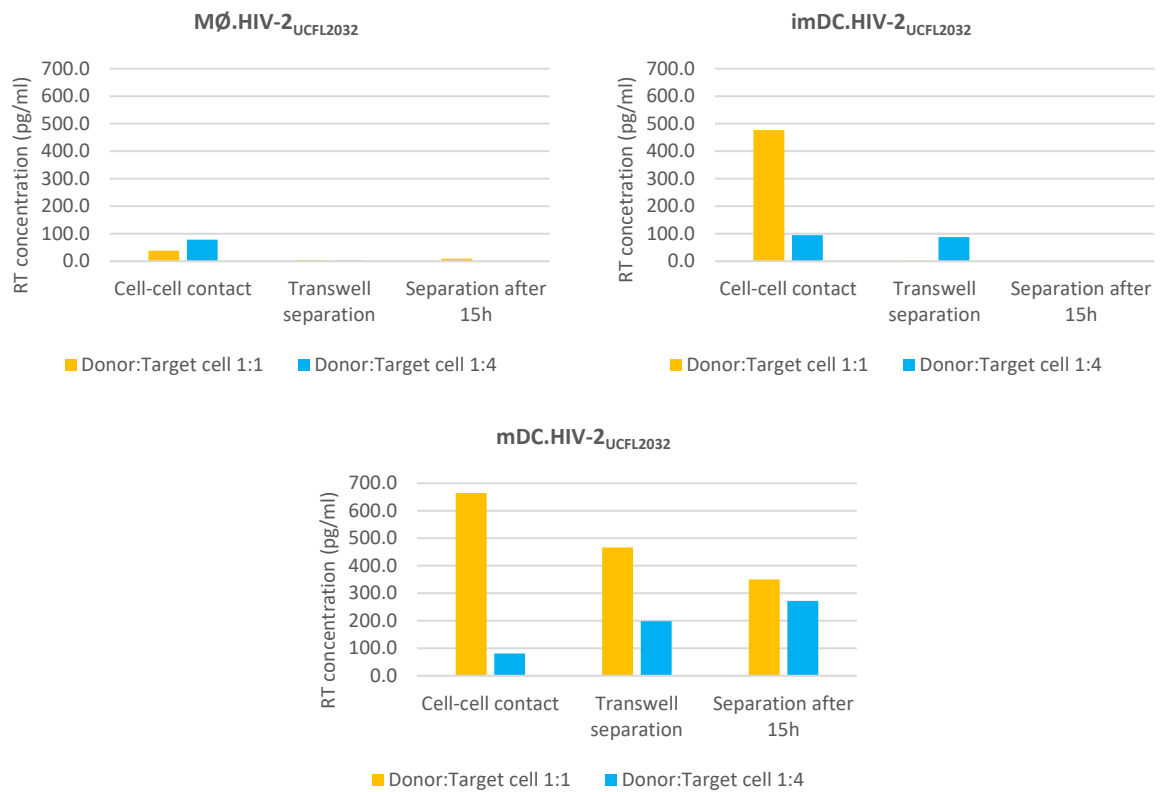

**Figure S5.** CD4<sup>+</sup> T lymphocytes trans-infection by Mø, imDCs, and mDCs infected by HIV-1<sub>UCFL2032</sub> primary isolate. These experiments were performed in three conditions: i) cell-cell contact, allowing donor and target cells to be in coculture throughout the experiment; ii) donor and target cells separated by a transwell to prevent cell-cell contact; and iii) donor and target cells separated 15 hours after coculture. Peak RT concentration was measured in culture supernatants during a 7-day period after virus inoculation.
